# Supplementary material for: Racial and Ethnic Disparities in the Medical Management of Poststroke Complications Among Patients With Acute Stroke
Source: PubMed Central journal article supplement — J Am Heart Assoc. 2024 Feb 23;13(5):e030537. doi: 10.1161/JAHA.123.030537 (PMC10944023; doi:10.1161/jaha.123.030537), 2024-02-23
Supplement: JAH3-13-e030537-s001.pdf [file JAH3-13-e030537-s001.pdf]

# **SUPPLEMENTAL MATERIAL**

**Table S1: Specific Codes Used to Define Outcomes**

| Post-Stroke Complication                                                                                                                | VA Class (description)                                                               | Additional medications                                                     | Procedure codes:                                                           | ICD-10 codes                                                  |
|-----------------------------------------------------------------------------------------------------------------------------------------|--------------------------------------------------------------------------------------|----------------------------------------------------------------------------|----------------------------------------------------------------------------|---------------------------------------------------------------|
| Fatigue                                                                                                                                 | CN801 (amphetamines)<br>CN802 (Amphetamine like stimulants)                          | Amantadine<br>Modafinil<br>Armodafinil                                     |                                                                            |                                                               |
| Spasticity                                                                                                                              |                                                                                      | Baclofen<br>Tizanidine<br>Dantrolene<br>botulinum toxin type A<br>diazepam |                                                                            |                                                               |
| Mood<br>Sleep                                                                                                                           | CN600 (Anti-depressants)<br>CV150 (alpha-blockers)<br>GU200 (Urinary anti-spasmodic) | Suvorexant<br>Zolpidem<br>Ramelteon<br>Melatonin<br>trazodone              |                                                                            |                                                               |
| Bladder                                                                                                                                 | CV150 (alpha-blockers)<br>GU200 (Urinary anti-spasmodic)                             |                                                                            |                                                                            |                                                               |
| Bowel                                                                                                                                   | RS300 (Rectal laxative)<br>GA200 (Laxative)                                          |                                                                            |                                                                            |                                                               |
| Seizure                                                                                                                                 | VA:CN400 (Anticonvulsants)                                                           |                                                                            |                                                                            |                                                               |
| <b>Procedures/medications:</b><br>tPA/Mechanical Thrombectomy<br>Neurological surgery procedure<br>Ventilation or mechanical intubation | VA:BL115 (Thrombolytics)                                                             |                                                                            | CPT:1006783<br><br>CPT:94002<br>CPT:94003<br>CPT:31500<br>SNOMED:447996002 |                                                               |
| <b>Stroke Manifestations</b><br>Cerebral edema                                                                                          |                                                                                      |                                                                            |                                                                            | G93.6<br>G93.5                                                |
| Seizure                                                                                                                                 |                                                                                      |                                                                            |                                                                            | G40                                                           |
| Hemiparesis                                                                                                                             |                                                                                      |                                                                            |                                                                            | G81                                                           |
| Aphasia                                                                                                                                 |                                                                                      |                                                                            |                                                                            | R47.01<br>I69.320<br>I69.920<br>I69.120<br>I69.820<br>I69.220 |

Abbreviations: VA: Department of Veterans Affairs, ICD-10: International Classification of Disease-10<sup>th</sup> edition, CPT: Current Procedure Codes, SNOMED: Systemized Nomenclature of Medicine Clinical Terms

**Table S2: Differences in Patient Characteristics Among Propensity Score Matched Acute Stroke Patients**

|                                       | NHW vs. Black (n= 63,722 PS Matched Pairs) |               |       | NHW vs. Hispanic (n=24,009 PS Matched Pairs) |               |       |
|---------------------------------------|--------------------------------------------|---------------|-------|----------------------------------------------|---------------|-------|
|                                       | NHW (%)                                    | Black (%)     | ASDs  | NHW (%)                                      | Hispanic (%)  | ASDs  |
| Age, years (std)                      | 59.7 +/- 14.3                              | 60.1 +/- 15.0 | 0.03  | 56.5 +/- 16.8                                | 56.4 +/- 16.5 | 0.01  |
| Female sex                            | 46.1                                       | 47.3          | 0.02  | 40.9                                         | 42.5          | 0.03  |
| <b>Comorbidities</b>                  |                                            |               |       |                                              |               |       |
| Hypertensive diseases                 | 29.5                                       | 30.1          | 0.01  | 23.4                                         | 23.1          | 0.01  |
| Chronic ischemic heart disease        | 7.6                                        | 8.4           | 0.03  | 6.9                                          | 7.1           | 0.01  |
| Acute myocardial infarction           | 2.6                                        | 2.7           | 0.01  | 2.1                                          | 2.2           | 0.01  |
| Hyperlipidemia                        | 14.7                                       | 15.7          | 0.03  | 12.9                                         | 12.9          | <0.01 |
| Atherosclerosis                       | 2.3                                        | 2.2           | 0.01  | 1.9                                          | 1.9           | 0.01  |
| Arterial thrombosis                   | 0.7                                        | 0.7           | 0.00  | 0.6                                          | 0.6           | 0.01  |
| Seizures                              | 2.3                                        | 2.4           | 0.00  | 2.0                                          | 2.0           | <0.01 |
| Parkinson's disease                   | 0.3                                        | 0.3           | 0.00  | 0.5                                          | 0.4           | 0.01  |
| Multiple sclerosis                    | 0.2                                        | 0.3           | 0.01  | 0.1                                          | 0.1           | 0.02  |
| Alzheimer's disease                   | 0.4                                        | 0.4           | 0.01  | 0.5                                          | 0.4           | <0.01 |
| Hemiplegia                            | 0.5                                        | 0.6           | <0.01 | 0.6                                          | 0.6           | <0.01 |
| Paraplegia                            | 0.3                                        | 0.3           | <0.01 | 0.2                                          | 0.2           | <0.01 |
| Peripheral neuropathy                 | 2.0                                        | 2.2           | 0.01  | 2.1                                          | 2.2           | 0.01  |
| Neurogenic bladder                    | 0.3                                        | 0.3           | 0.01  | 0.3                                          | 0.4           | 0.01  |
| Neurogenic bowel                      | 0.0                                        | 0.1           | <0.01 | 0.1                                          | 0.1           | 0.01  |
| Constipation                          | 4.9                                        | 5.0           | <0.01 | 4.6                                          | 4.9           | 0.02  |
| Type 1 diabetes mellitus              | 1.8                                        | 1.7           | 0.01  | 1.7                                          | 1.7           | <0.01 |
| Type 2 diabetes mellitus              | 15.8                                       | 16.0          | 0.01  | 15.9                                         | 15.8          | <0.01 |
| Obesity                               | 6.1                                        | 6.4           | 0.02  | 5.9                                          | 6.0           | 0.01  |
| Depression                            | 5.1                                        | 5.4           | 0.02  | 5.9                                          | 6.0           | 0.01  |
| Anxiety                               | 4.9                                        | 4.3           | 0.02  | 5.4                                          | 5.4           | <0.01 |
| Sleep disorders                       | 5.3                                        | 5.7           | 0.02  | 5.4                                          | 5.6           | 0.01  |
| Chronic obstructive pulmonary disease | 4.2                                        | 4.7           | 0.02  | 2.2                                          | 2.3           | <0.01 |
| Asthma                                | 3.6                                        | 3.8           | 0.01  | 2.5                                          | 2.6           | <0.01 |
| Acute kidney failure                  | 6.9                                        | 7.0           | <0.01 | 5.2                                          | 5.2           | <0.01 |
| Chronic kidney disease                | 9.8                                        | 10.0          | 0.01  | 7.2                                          | 7.3           | 0.01  |
| Benign prostatic hyperplasia          | 2.0                                        | 2.2           | 0.01  | 2.2                                          | 2.2           | <0.01 |
| Neoplasm                              | 9.9                                        | 10.3          | 0.01  | 9.2                                          | 9.3           | 0.01  |
| <b>Prior Medication Use</b>           |                                            |               |       |                                              |               |       |
| Anticonvulsants                       | 10.5                                       | 10.9          | 0.01  | 10.5                                         | 10.6          | <0.01 |

|                                                     |      |      |       |      |      |       |
|-----------------------------------------------------|------|------|-------|------|------|-------|
| CNS stimulants                                      | 1.2  | 1.2  | 0.01  | 2.0  | 2.0  | <0.01 |
| SSRI/SNRIs                                          | 8.2  | 8.7  | 0.02  | 9.8  | 10.1 | 0.01  |
| Laxatives                                           | 17.8 | 18.1 | 0.04  | 16.6 | 16.5 | <0.01 |
| Alpha blockers                                      | 3.5  | 3.5  | <0.01 | 3.5  | 3.4  | <0.01 |
| Urinary Anti-spasmodic                              | 1.4  | 1.3  | 0.01  | 0.9  | 0.8  | <0.01 |
| Melatonin                                           | 2.5  | 2.6  | 0.01  | 3.3  | 3.4  | <0.01 |
| Tizanidine                                          | 0.8  | 0.8  | 0.01  | 0.9  | 0.8  | <0.01 |
| Baclofen                                            | 0.8  | 1.0  | 0.02  | 0.8  | 1.0  | 0.02  |
| Insulin                                             | 12.2 | 12.1 | <0.01 | 12.4 | 12.2 | 0.01  |
| <b>Prior Laboratory Data</b>                        |      |      |       |      |      |       |
| Hemoglobin A1c                                      |      |      |       |      |      |       |
| 0 – 5.70 %                                          | 3.8  | 3.9  | 0.01  | 3.1  | 3.1  | 0.01  |
| 5.70 – 6.50 %                                       | 5.4  | 5.4  | <0.01 | 4.0  | 4.0  | <0.01 |
| 6.50 – 9.0 %                                        | 5.7  | 5.6  | <0.01 | 4.5  | 4.5  | <0.01 |
| > 9.0 %                                             | 3.1  | 3.2  | <0.01 | 3.0  | 3.0  | 0.01  |
| Systolic blood pressure (mm Hg)                     |      |      |       |      |      |       |
| < 140                                               | 23.4 | 23.8 | <0.01 | 18.1 | 18.0 | <0.01 |
| 140 – 180                                           | 22.0 | 21.9 | <0.01 | 13.1 | 13.2 | <0.01 |
| 180 – 220                                           | 0.6  | 7.6  | <0.01 | 3.9  | 3.8  | 0.01  |
| > 220                                               | 1.2  | 1.2  | 0.01  | 0.6  | 0.6  | <0.01 |
| Cholesterol in LDL [Mass/volume] in Serum or Plasma |      |      |       |      |      |       |
| 0 - 70 mg/dL                                        | 3.4  | 3.6  | 0.01  | 3.1  | 3.3  | 0.01  |
| 71 - 189 mg/dL                                      | 9.6  | 10.0 | 0.01  | 6.7  | 6.8  | <0.01 |
| >190 mg/dL                                          | 0.5  | 0.5  | <0.01 | 0.3  | 0.3  | 0.01  |
| <b>Prior Hospitalization</b>                        | 22.1 | 22.5 | 0.01  | 21.3 | 21.3 | <0.01 |

Abbreviations: NHW: Non-Hispanic White, ASD: Absolute Standardized Difference. CNS: Central Nervous System, SSRI/SNRIs: Selective Serotonin or Serotonin Norepinephrine Reuptake Inhibitors

Data was collected for the year prior to the indexed stroke.

ASDs >0.10 were considered clinically important differences.

Matched pairs: Patients were matched using a multivariable propensity score. Separate propensity scores matches were performed for the NHW vs. Black and NHW vs. Hispanic comparisons.

**Table S3: Relative Risk for Medical Treatment for Common Post-Stroke Complications Among Propensity Score Matched Patients**

| Post-Stroke Complication | NHW vs. Black: RR (95% CI) n=63,722 PS Matched Pairs |                   |                   | NHW vs. Hispanic: RR (95% CI) n= 24,009 PS Matched Pairs |                   |                   |
|--------------------------|------------------------------------------------------|-------------------|-------------------|----------------------------------------------------------|-------------------|-------------------|
|                          | 14-days                                              | 90-days           | 365-days          | 14-days                                                  | 90-days           | 365-days          |
| Arousal/Fatigue          | 0.58 (0.54, 0.62)                                    | 0.72 (0.68, 0.76) | 0.72 (0.68, 0.76) | 0.77 (0.70, 0.85)                                        | 0.85 (0.79, 0.92) | 0.83 (0.78, 0.90) |
| Spasticity               | 0.64 (0.62, 0.67)                                    | 0.73 (0.70, 0.75) | 0.79 (0.77, 0.82) | 0.67 (0.63, 0.72)                                        | 0.72 (0.70, 0.76) | 0.77 (0.73, 0.81) |
| Mood disorder            | 0.72 (0.70, 0.74)                                    | 0.78 (0.76, 0.79) | 0.81 (0.80, 0.82) | 0.79 (0.77, 0.82)                                        | 0.82 (0.78, 0.85) | 0.84 (0.82, 0.86) |
| Sleep disturbance        | 0.78 (0.76, 0.80)                                    | 0.81 (0.79, 0.83) | 0.84 (0.82, 0.86) | 0.92 (0.89, 0.96)                                        | 0.95 (0.91, 0.98) | 0.96 (0.93, 0.98) |
| Neurogenic bladder       | 0.74 (0.72, 0.76)                                    | 0.78 (0.76, 0.80) | 0.81 (0.79, 0.83) | 1.12 (1.08, 1.16)                                        | 1.11 (1.08, 1.15) | 1.11 (1.07, 1.14) |
| Neurogenic bowel         | 0.99 (0.97, 0.99)                                    | 1.00 (0.99, 1.01) | 1.01 (1.01, 1.02) | 1.04 (1.03, 1.05)                                        | 1.03 (1.02, 1.04) | 1.03 (1.02, 1.04) |
| Seizure                  | 0.89 (0.88, 0.90)                                    | 0.92 (0.91, 0.94) | 0.95 (0.94, 0.96) | 0.98 (0.96, 1.00)                                        | 0.98 (0.96, 1.01) | 0.99 (0.97, 1.01) |

Abbreviations: NHW: Non-Hispanic White, RR: Relative Risk, CI: Confidence Interval, PS: Propensity Score

Time starts on day one of the acute hospitalization from the indexed stroke.

Matched pairs: Patients were matched 1:1 based on a propensity score estimated from a multivariable logistic regression model. Separate propensity score matches were performed for the NHW vs. Black and NHW vs. Hispanic comparisons. Significance was set at  $p < 0.05$ .

**Table S4:** Unadjusted results: Race/Ethnic Differences in the Medical Treatment of Post-Stroke Complications Among Patients Prior to Propensity Score Matching

| Post-Stroke Complication | NHW (n=259,805) vs. Black (n=64,456): RR (95% CI) |                   |                   | NHW (n=259,809) vs. Hispanic (n=24,025) RR (95% CI) |                   |                   |
|--------------------------|---------------------------------------------------|-------------------|-------------------|-----------------------------------------------------|-------------------|-------------------|
|                          | 14-days                                           | 90-days           | 365-days          | 14-days                                             | 90-days           | 365-days          |
| Arousal/fatigue          | 0.57 (0.53,0.60)                                  | 0.73 (0.70, 0.76) | 0.73 (0.70, 0.76) | 0.95 (0.88, 1.02)                                   | 1.04 (0.98, 1.10) | 1.01 (0.95, 1.07) |
| Spasticity               | 0.67 (0.65, 0.69)                                 | 0.77 (0.75, 0.79) | 0.83 (0.81, 0.86) | 0.72 (0.68, 0.75)                                   | 0.77 (0.74, 0.81) | 0.82 (0.79, 0.86) |
| Mood disorder            | 0.64 (0.63, 0.65)                                 | 0.71 (0.70, 0.72) | 0.76 (0.75, 0.77) | 0.72 (0.70, 0.74)                                   | 0.77 (0.76, 0.79) | 0.80 (0.79, 0.82) |
| Sleep disturbance        | 0.73 (0.71, 0.74)                                 | 0.78 (0.76, 0.79) | 0.81 (0.80, 0.82) | 0.89 (0.86, 0.91)                                   | 0.93 (0.90, 0.95) | 0.93 (0.91, 0.95) |
| Neurogenic bladder       | 0.68 (0.66, 0.69)                                 | 0.72 (0.70, 0.73) | 0.75 (0.73, 0.76) | 1.04 (1.01, 1.06)                                   | 1.03 (1.01, 1.06) | 1.02 (1.00, 1.04) |
| Neurogenic bowel         | 0.98 (0.97, 0.98)                                 | 0.99 (0.98, 1.00) | 1.00 (0.99, 1.01) | 1.04 (1.03, 1.04)                                   | 1.03 (1.02, 1.03) | 1.02 (1.02, 1.03) |
| Seizure                  | 0.91 (0.90, 0.92)                                 | 0.94 (0.93, 0.95) | 0.97 (0.96, 0.98) | 1.05 (1.04, 1.07)                                   | 1.05 (1.04, 1.07) | 1.05 (1.04, 1.07) |

Significance was set at  $p < 0.05$ . Abbreviations: NHW: Non-Hispanic White, RR: Relative Risk, CI: Confidence Interval  
Time starts on day one of the acute hospitalization from the indexed stroke.

**Table S5:** Risk Differences for Medical Treatment for Common Post-Stroke Complications Among Propensity Score Matched Patients

| Post-Stroke Complication | NHW vs. Black: RD (95% CI) n=63,722 PS Matched Pairs |                    |                   | NHW vs. Hispanic: RD (95% CI) n= 24,009 PS Matched Pairs |                    |                   |
|--------------------------|------------------------------------------------------|--------------------|-------------------|----------------------------------------------------------|--------------------|-------------------|
|                          | 14-days                                              | 90-days            | 365-days          | 14-days                                                  | 90-days            | 365-days          |
| Arousal/Fatigue          | -1.3 (-1.5, -1.2)                                    | -1.3 (-1.4, -1.1)  | -1.5 (-1.7, -1.2) | -0.2 (-0.4, -0.1)                                        | -0.9 (-1.2, -0.45) | -1.0 (-1.5, -0.6) |
| Spasticity               | -3.1 (-3.4, -2.8)                                    | -2.5 (-2.7, -2.2)  | -2.7 (-3.1, -2.4) | -2.4 (-2.7, -2.08)                                       | -3.2 (-3.7, -2.7)  | -3.1 (-3.7, -2.6) |
| Mood disorder            | -6.9 (-7.4, -6.4)                                    | -9.6 (-10.0, -9.3) | -6.7 (-7.2, -6.2) | -8.1 (-8.6, -7.5)                                        | -5.7 (-6.5, -4.8)  | -5.6 (-6.5, -4.8) |
| Sleep disturbance        | -3.9 (-4.3, -3.4)                                    | -5.4 (-5.8, -5.1)  | -4.2 (-4.7, -3.7) | -2.3 (-2.8, -1.8)                                        | -1.3 (-2.1, -0.6)  | -1.2 (-2.0, -0.4) |
| Neurogenic bladder       | -4.7 (-5.2, -4.3)                                    | -6.5 (-6.8, -6.1)  | -4.4 (-4.8, -3.9) | 0.7 (0.2, 1.3)                                           | 2.3 (1.5, 3.1)     | 2.5 (1.7, 3.2)    |
| Neurogenic bowel         | -0.5 (-1.1, 0.1)                                     | -0.7 (-1.1, -0.3)  | 0.9 (0.4, 1.4)    | 2.3 (1.7, 2.9)                                           | 2.0 (1.2, 2.8)     | 2.2 (1.4, 3.0)    |
| Seizure                  | -4.1 (-4.7, -3.6)                                    | -2.3 (-2.7, -1.9)  | -2.1 (-2.7, -1.6) | 2.0 (1.4, 2.7)                                           | -0.7 (-1.6, 0.2)   | -0.6 (-1.5, 0.3)  |

Abbreviations: NHW: Non-Hispanic White, RD: Risk Difference, CI: Confidence Interval, PS: Propensity Score  
Time starts on day one of the acute hospitalization from the indexed stroke.

Matched pairs: Patients were matched 1:1 based on a propensity score estimated from a multivariable logistic regression model. Separate propensity score matches were performed for the NHW vs. Black and NHW vs. Hispanic comparisons. Significance was set at  $p < 0.05$ .

**Table S6:** Proportion of Patients Receiving Medications for the Treatment of Common Post-Stroke Complications Among Propensity Score Matched Patients

|                           | NHW vs. Black n=63,722 PS Matched Pairs |             |              | NHW vs. Hispanic: n= 24,009 PS Matched Pairs |             |              |
|---------------------------|-----------------------------------------|-------------|--------------|----------------------------------------------|-------------|--------------|
|                           | 14-days (%)                             | 90-days (%) | 365-days (%) | 14-days (%)                                  | 90-days (%) | 365-days (%) |
| <b>Arousal/Fatigue</b>    |                                         |             |              |                                              |             |              |
| NHW                       | 3.2                                     | 4.6         | 5.2          | NHW                                          | 3.2         | 5.6          |
| Black                     | 1.9                                     | 3.3         | 3.8          | Hispanic                                     | 3.1         | 4.8          |
| <b>Spasticity</b>         |                                         |             |              |                                              |             |              |
| NHW                       | 8.9                                     | 10.5        | 13.3         | NHW                                          | 8.5         | 11.4         |
| Black                     | 5.9                                     | 8.1         | 10.6         | Hispanic                                     | 6.1         | 8.2          |
| <b>Mood disorder</b>      |                                         |             |              |                                              |             |              |
| NHW                       | 25.6                                    | 33.6        | 34.8         | NHW                                          | 28.6        | 31.7         |
| Black                     | 18.7                                    | 24.0        | 28.2         | Hispanic                                     | 20.6        | 26.0         |
| <b>Sleep disturbance</b>  |                                         |             |              |                                              |             |              |
| NHW                       | 18.9                                    | 24.3        | 25.9         | NHW                                          | 20.2        | 23.8         |
| Black                     | 15.1                                    | 18.9        | 21.7         | Hispanic                                     | 17.9        | 22.5         |
| <b>Neurogenic bladder</b> |                                         |             |              |                                              |             |              |
| NHW                       | 18.7                                    | 22.7        | 22.9         | NHW                                          | 20.0        | 21.0         |
| Black                     | 13.9                                    | 16.2        | 18.5         | Hispanic                                     | 20.7        | 23.4         |
| <b>Neurogenic bowel</b>   |                                         |             |              |                                              |             |              |
| NHW                       | 67.4                                    | 69.5        | 71.2         | NHW                                          | 66.4        | 69.1         |
| Black                     | 66.9                                    | 68.8        | 72.1         | Hispanic                                     | 68.7        | 71.1         |
| <b>Seizure</b>            |                                         |             |              |                                              |             |              |
| NHW                       | 38.5                                    | 40.1        | 43.8         | NHW                                          | 37.1        | 42.9         |
| Black                     | 34.4                                    | 37.8        | 41.7         | Hispanic                                     | 39.2        | 42.3         |

Abbreviations: NHW: Non-Hispanic White, PS: Propensity Score

Time starts on day one of the acute hospitalization from the indexed stroke.

Matched pairs: Patients were matched 1:1 based on a propensity score estimated from a multivariable logistic regression model. Separate propensity score matches were performed for the NHW vs. Black and NHW vs. Hispanic comparisons.



**Table S7:** Subgroup Analysis: Relative Risk for Race/Ethnic Differences in the Medical Treatment of Post-Stroke Complications Among Propensity Score Matched Ischemic Stroke Patients

| Post-Stroke Complication | NHW vs. Black: RR (95% CI) n=47,907 PS Matched Pairs |                   |                   | NHW vs. Hispanic: RR (95% CI) n= 18,569 PS Matched Pairs |                   |                   |
|--------------------------|------------------------------------------------------|-------------------|-------------------|----------------------------------------------------------|-------------------|-------------------|
|                          | 14-days                                              | 90-days           | 365-days          | 14-days                                                  | 90-days           | 365-days          |
| Arousal/Fatigue          | 0.58 (0.53, 0.63)                                    | 0.73 (0.68, 0.78) | 0.71 (0.67, 0.76) | 0.76 (0.67, 0.85)                                        | 0.75 (0.68, 0.83) | 0.74 (0.67, 0.80) |
| Spasticity               | 0.66 (0.63, 0.69)                                    | 0.78 (0.75, 0.81) | 0.83 (0.81, 0.86) | 0.67 (0.62, 0.72)                                        | 0.72 (0.67, 0.76) | 0.76 (0.72, 0.80) |
| Mood disorder            | 0.77 (0.76, 0.79)                                    | 0.84 (0.82, 0.85) | 0.87 (0.85, 0.88) | 0.77 (0.74, 0.79)                                        | 0.81 (0.78, 0.83) | 0.83 (0.81, 0.85) |
| Sleep disturbance        | 0.82 (0.80, 0.84)                                    | 0.87 (0.85, 0.89) | 0.89 (0.88, 0.91) | 0.86 (0.83, 0.90)                                        | 0.88 (0.85, 0.91) | 0.89 (0.86, 0.92) |
| Neurogenic bladder       | 0.82 (0.80, 0.84)                                    | 0.88 (0.86, 0.91) | 0.89 (0.87, 0.92) | 1.06 (1.01, 1.11)                                        | 0.99 (0.95, 1.03) | 0.98 (0.95, 1.02) |
| Neurogenic bowel         | 1.02 (1.01, 1.03)                                    | 1.01 (1.00, 1.02) | 1.02 (1.01, 1.03) | 1.07 (1.05, 1.08)                                        | 1.04 (1.02, 1.05) | 1.04 (1.02, 1.05) |
| Seizure                  | 0.96 (0.94, 0.97)                                    | 0.98 (0.96, 1.00) | 1.01 (0.99, 1.03) | 0.92 (0.89, 0.95)                                        | 0.92 (0.90, 0.95) | 0.93 (0.91, 0.96) |

Abbreviations: NHW: Non-Hispanic White, RR: Relative Risk, CI: Confidence Interval, PS: Propensity Score

Time starts on day one of the acute hospitalization from the indexed stroke.

Matched pairs: Patients were matched 1:1 based on a propensity score estimated from a multivariable logistic regression model. Separate propensity score matches were performed for the NHW vs. Black and NHW vs. Hispanic comparisons. Significance was set at  $p < 0.05$ .

**Table S8:** Subgroup Analysis: Relative Risk for Race/Ethnic Differences in the Management of Post-Stroke Complications Among Propensity Score Matched Patients <65 Years of Age

| Post-Stroke Complication | NHW vs. Black: RR (95% CI) n=42,963 PS Matched Pairs |                   |                   | NHW vs. Hispanic: RR (95% CI) n= 17,156 PS Matched Pairs |                   |                   |
|--------------------------|------------------------------------------------------|-------------------|-------------------|----------------------------------------------------------|-------------------|-------------------|
|                          | 14-days                                              | 90-days           | 365-days          | 14-days                                                  | 90-days           | 365-days          |
| Arousal/Fatigue          | 0.74 (0.69, 0.81)                                    | 0.85 (0.78, 0.90) | 0.82 (0.77, 0.87) | 0.81 (0.72, 0.90)                                        | 0.83 (0.76, 0.90) | 0.82 (0.75, 0.89) |
| Spasticity               | 0.68 (0.65, 0.72)                                    | 0.78 (0.75, 0.81) | 0.85 (0.82, 0.87) | 0.63 (0.59, 0.68)                                        | 0.74 (0.69, 0.79) | 0.78 (0.74, 0.82) |
| Mood disorder            | 0.79 (0.77, 0.81)                                    | 0.84 (0.83, 0.86) | 0.87 (0.86, 0.89) | 0.75 (0.72, 0.78)                                        | 0.76 (0.73, 0.78) | 0.79 (0.77, 0.81) |
| Sleep disturbance        | 0.89 (0.86, 0.91)                                    | 0.91 (0.89, 0.94) | 0.94 (0.92, 0.96) | 0.91 (0.87, 0.95)                                        | 0.85 (0.82, 0.88) | 0.86 (0.83, 0.89) |
| Neurogenic bladder       | 0.79 (0.76, 0.81)                                    | 0.82 (0.79, 0.84) | 0.85 (0.82, 0.87) | 1.19 (1.13, 1.24)                                        | 1.12 (1.07, 1.16) | 1.11 (1.07, 1.16) |
| Neurogenic bowel         | 0.97 (0.96, 0.98)                                    | 0.98 (0.98, 0.99) | 1.00 (0.99, 1.01) | 1.04 (1.02, 1.05)                                        | 1.02 (1.01, 1.04) | 1.03 (1.01, 1.04) |
| Seizure                  | 0.87 (0.86, 0.89)                                    | 0.90 (0.89, 0.91) | 0.93 (0.92, 0.94) | 1.00 (0.98, 1.03)                                        | 1.00 (0.98, 1.02) | 0.99 (0.97, 1.01) |

Significance was set at  $p < 0.05$ . Abbreviations: NHW: Non-Hispanic White, RR: Relative Risk, CI: Confidence Interval, PS: Propensity Score

Time starts on day one of the acute hospitalization from the indexed stroke.

Matched pairs: Patients were matched 1:1 based on a propensity score estimated from a multivariable logistic regression model. Separate propensity score matches were performed for the NHW vs. Black and NHW vs. Hispanic comparisons.

**Table S9:** Subgroup Analysis: Relative Risk for Race/Ethnic Differences in the Medical Treatment of Post-Stroke Complications at 90 days Stratified by Decade

| <b>Post-Stroke<br/>Complication</b> | NHW vs. Black: RR (95% CI)              |                                          | NHW vs. Hispanic: RR (95% CI)           |                                          |
|-------------------------------------|-----------------------------------------|------------------------------------------|-----------------------------------------|------------------------------------------|
|                                     | 2003-2012 (n=5,674 PS<br>Matched Pairs) | 2013-2022 (n=57,973 PS<br>Matched Pairs) | 2003-2012 (n=2,292 PS Matched<br>Pairs) | 2013-2022 (n=21,693 PS<br>Matched Pairs) |
| Arousal/Fatigue                     | 0.69 (0.54, 0.88)                       | 0.74 (0.70, 0.78)                        | 0.67 (0.48, 0.94)                       | 0.88 (0.81, 0.95)                        |
| Spasticity                          | 0.49 (0.43, 0.57)                       | 0.75 (0.72, 0.78)                        | 0.50 (0.40, 0.63)                       | 0.72 (0.68, 0.76)                        |
| Mood disorder                       | 0.69 (0.64, 0.74)                       | 0.79 (0.77, 0.80)                        | 0.72 (0.64, 0.82)                       | 0.84 (0.82, 0.86)                        |
| Sleep disturbance                   | 0.89 (0.81, 0.99)                       | 0.82 (0.80, 0.84)                        | 0.83 (0.70, 0.98)                       | 0.97 (0.94, 1.00)                        |
| Neurogenic bladder                  | 0.60 (0.54, 0.66)                       | 0.80 (0.78, 0.82)                        | 0.76 (0.66, 0.88)                       | 1.14 (1.10, 1.18)                        |
| Neurogenic bowel                    | 0.97 (0.93, 1.00)                       | 1.01 (0.99, 1.01)                        | 0.84 (0.78, 0.89)                       | 1.05 (1.04, 1.06)                        |
| Seizure                             | 0.77 (0.72, 0.82)                       | 0.94 (0.92, 0.95)                        | 0.74 (0.67, 0.82)                       | 1.01 (0.99, 1.03)                        |

Abbreviations: NHW: Non-Hispanic White, RR: Relative Risk, CI: Confidence Interval, PS: Propensity Score

Time starts on day one of the acute hospitalization from the indexed stroke.

Matched pairs: Patients were matched 1:1 based on a propensity score estimated from a multivariable logistic regression model. Separate propensity score matches were performed by decade and for each NHW vs. Black and NHW vs. Hispanic comparison. Significance was set at  $p < 0.05$ .
